# Supplementary material for: Differential Gene Expression Associated with Soybean Oil Level in the Diet of Pigs
Source: Preprints.org preprint supplement (doi:10.20944/preprints202205.0081.v1), 2022-05-06
Supplement: Supplementary file 2 [file Table S1 reads.xlsx]

## Sheet: Página1
Table S1: Mapped reads Sscrofa11.1 reference genome assembly
DIET: SOY1.5
Samples (liver)	Reads strandR1	Reads strandR2	Total_reads	Trimmed readsR1	Trimmed readsR2	Total_trimmed	Difference	uniquely mapped	uniquely mapped (%)	unmapped	unmapped (%)	multimapping	multimapping (%)	noFeature	noFeature (%)	ambiguous	ambiguous (%)
L4	16976486	16976486	33952972	16763079	16763079	33526158	426814	14910807	88.95	249065	1.49	1603207	9.56	1058381	6.31	1056658	6.3
L7	23406368	23406368	46812736	23157593	23157593	46315186	497550	20353858	87.89	362102	1.56	2441633	10.54	1689839	7.3	1292478	5.58
L13	16285871	16285871	32571742	15974514	15974514	31949028	622714	8091440	50.65	469387	2.94	7413687	46.41	3497566	21.89	384796	2.41
L14	17569096	17569096	35138192	17291477	17291477	34582954	555238	14628760	84.6	375154	2.17	2287563	13.23	1515419	8.76	994285	5.75
L16	19341857	19341857	38683714	19070176	19070176	38140352	543362	15454412	81.04	517982	2.72	3097782	16.24	1576071	8.26	1015899	5.33
L28	17127166	17127166	34254332	16802121	16802121	33604242	650090	10892248	64.83	822851	4.9	5087022	30.28	2046837	12.18	756569	4.5
L32	18474696	18474696	36949392	18219469	18219469	36438938	510454	15348837	84.24	544374	2.99	2326258	12.77	1211530	6.65	982366	5.39
L33	16073495	16073495	32146990	15820698	15820698	31641396	505594	13255842	83.79	417823	2.64	2147033	13.57	1565840	9.9	961109	6.08
L34	16827574	16827574	33655148	16591270	16591270	33182540	472608	12392287	74.69	436379	2.63	3762604	22.68	3207156	19.33	692435	4.17
L35	15873423	15873423	31746846	15628724	15628724	31257448	489398	11887923	76.06	441929	2.83	3298872	21.11	1380930	8.84	972737	6.22
L41	14053129	14053129	28106258	13812926	13812926	27625852	480406	11526991	83.45	447675	3.24	1838260	13.31	962233	6.97	755413	5.47
L43	14976488	14976488	29952976	14750942	14750942	29501884	451092	12820475	86.91	294858	2	1635609	11.09	1047544	7.1	927262	6.29
L47	15428890	15428890	30857780	15196845	15196845	30393690	464090	12903754	84.91	404659	2.66	1888432	12.43	1085222	7.14	890409	5.86
L49	14756528	14756528	29513056	14514882	14514882	29029764	483292	8414154	57.97	357702	2.46	5743026	39.57	2370130	16.33	409401	2.82
L56	14250075	14250075	28500150	14017456	14017456	28034912	465238	9066081	64.68	416333	2.97	4535042	32.35	1965126	14.02	534219	3.81
L62	17292555	17292555	34585110	17118909	17118909	34237818	347292	14601231	85.29	338738	1.98	2178940	12.73	1406953	8.22	991212	5.79
L66	16560931	16560931	33121862	16388636	16388636	32777272	344590	14096298	86.01	325462	1.99	1966876	12	1665594	10.16	1035773	6.32
DIET: SOY3.0
Samples (liver)	Reads_strandR1	Reads_strandR2	Total_reads	Trimmed_readsR1	Trimmed_readsR1	Total_trimmed	Difference	uniquely mapped	uniquely mapped (%)	unmapped	unmapped (%)	multimapping	multimapping (%)	noFeature	noFeature (%)	ambiguous	ambiguous (%)
L3	17396801	17396801	34793602	17189863	17189863	34379726	413876	15322651	89.14	251676	1.46	1615536	9.4	1180452	6.87	1057384	6.15
L10	20704172	20704172	41408344	20449667	20449667	40899334	509010	17850070	87.29	548816	2.68	2050781	10.03	1663134	8.13	1167442	5.71
L11	15858812	15858812	31717624	15683401	15683401	31366802	350822	13327649	84.98	292638	1.87	2063114	13.15	1042591	6.65	932080	5.94
L12	17957727	17957727	35915454	17714575	17714575	35429150	486304	15299417	86.37	326071	1.84	2089087	11.79	1430116	8.07	1051922	5.94
L18	16192070	16192070	32384140	15975133	15975133	31950266	433874	12928526	80.93	434685	2.72	2611922	16.35	1331174	8.33	1040144	6.51
L19	15751527	15751527	31503054	15526082	15526082	31052164	450890	12918890	83.21	398099	2.56	2209093	14.23	1278960	8.24	836008	5.38
L26	16829185	16829185	33658370	16590646	16590646	33181292	477078	13755431	82.91	372460	2.24	2462755	14.84	1277946	7.7	1028891	6.2
L46	15265575	15265575	30531150	15009755	15009755	30019510	511640	7506700	50.01	408385	2.72	7094670	47.27	3091736	20.6	351785	2.34
L53	14581821	14581821	29163642	14334854	14334854	28669708	493934	10922833	76.2	378006	2.64	3034015	21.17	1424690	9.94	863699	6.03
L54	15593189	15593189	31186378	15384127	15384127	30768254	418124	11637355	75.65	367134	2.39	3379638	21.97	1743102	11.33	849366	5.52
L55	18872901	18872901	37745802	18594669	18594669	37189338	556464	14784238	79.51	467403	2.51	3343028	17.98	1756553	9.45	1018623	5.48
L59	16293809	16293809	32587618	16054665	16054665	32109330	478288	13185148	82.13	564057	3.51	2305460	14.36	1258333	7.84	982512	6.12
L61	16259565	16259565	32519130	15989887	15989887	31979774	539356	7456637	46.63	464786	2.91	8068464	50.46	3294736	20.61	351700	2.2
L63	17530152	17530152	35060304	17310788	17310788	34621576	438728	14558349	84.1	387820	2.24	2364619	13.66	1521411	8.79	984515	5.69
L68	18432836	18432836	36865672	18212361	18212361	36424722	440950	13640398	74.9	424097	2.33	4147866	22.78	1927704	10.58	965778	5.3
L69	16561309	16561309	33122618	16355205	16355205	32710410	412208	14466834	88.45	363577	2.22	1524794	9.32	1239641	7.58	986784	6.03
L70	17487210	17487210	34974420	17248945	17248945	34497890	476530	13746326	79.69	511268	2.96	2991351	17.34	1524966	8.84	885291	5.13
L72	19141470	19141470	38282940	18873100	18873100	37746200	536740	14721124	78	520454	2.76	3631522	19.24	1424180	7.55	1169442	6.2
DIET: SOY1.5
Samples (muscle)	Reads_strandR1	Reads_strandR2	Total_reads	Trimmed_readsR1	Trimmed_reads2	Total_trimmed	Difference	uniquely mapped	uniquely mapped (%)	unmapped	unmapped (%)	multimapping	multimapping (%)	noFeature	noFeature (%)	ambiguous	ambiguous (%)
M4	17267556	17267556	34535112	16937791	16937791	33875582	659530	15735912	92.9042	700025	4.13292	501854	2.96292	1967386	11.6154	1073907	6.3403
M7	15768590	15768590	31537180	15473109	15473109	30946218	590962	14535788	93.9423	484636	3.13212	452685	2.92562	1662908	10.7471	1231786	7.96082
M13	15147254	15147254	30294508	14928139	14928139	29856278	438230	14149775	94.7859	344684	2.30895	433680	2.90512	1374364	9.20653	1324420	8.87197
M14	14953433	14953433	29906866	14708222	14708222	29416444	490422	13757685	93.5374	507714	3.45191	442823	3.01072	1525399	10.3711	1035492	7.04023
M16	15040352	15040352	30080704	14832612	14832612	29665224	415480	13965862	94.1565	484239	3.26469	382511	2.57885	1168857	7.88032	1222158	8.23967
M28	19113774	19113774	38227548	18808021	18808021	37616042	611506	17661126	93.9021	549536	2.92182	597359	3.17609	1801330	9.57746	1652518	8.78624
M32	18292938	18292938	36585876	18074419	18074419	36148838	437038	17012911	94.127	499126	2.76151	562382	3.11148	1886771	10.4389	1513254	8.37235
M33	18785249	18785249	37570498	18531101	18531101	37062202	508296	17411530	93.9584	588977	3.17832	530594	2.86326	1519639	8.20048	1736943	9.37312
M34	17881329	17881329	35762658	17644950	17644950	35289900	472758	16632341	94.2612	528331	2.99423	484278	2.74457	1091231	6.18438	1755672	9.95
M35	17165144	17165144	34330288	16948708	16948708	33897416	432872	15987333	94.3277	462476	2.72868	498899	2.94358	1967112	11.6063	1131961	6.67875
M37	17432175	17432175	34864350	17162089	17162089	34324178	540172	16256935	94.7259	382031	2.22602	523123	3.04813	1594527	9.29098	1608674	9.37342
M41	17482308	17482308	34964616	17223676	17223676	34447352	517264	16174881	93.9107	608607	3.53355	440188	2.55571	2291311	13.3033	918563	5.33314
M43	15007205	15007205	30014410	14798993	14798993	29597986	416424	13662385	92.3197	676457	4.57097	460151	3.10934	1324060	8.94696	1220713	8.24862
M47	13841460	13841460	27682920	13664442	13664442	27328884	354036	12882500	94.2775	399432	2.92315	382510	2.79931	1395925	10.2157	1028188	7.52455
M49	17707101	17707101	35414202	17467077	17467077	34934154	480048	16574596	94.8905	387096	2.21615	505385	2.89336	1365653	7.81844	1859380	10.6451
M56	16316156	16316156	32632312	16108973	16108973	32217946	414366	14879428	92.3673	760398	4.72034	469147	2.91233	1931174	11.9882	1013493	6.29148
M62	16595573	16595573	33191146	16319678	16319678	32639356	551790	15405796	94.4001	522489	3.20159	391393	2.39829	1579448	9.67818	1145757	7.02071
M66	17334677	17334677	34669354	17060580	17060580	34121160	548194	15853475	92.9246	706749	4.14258	500356	2.93282	1669926	9.78821	1202649	7.04929
DIET: SOY3.0
Samples	Reads_strandR1	Reads_strandR2	Total_reads	Trimmed_readsR1	Trimmed_reads2	Total_trimmed	Difference	uniquely mapped	uniquely mapped (%)	unmapped	unmapped (%)	multimapping	multimapping (%)	noFeature	noFeature (%)	ambiguous	ambiguous (%)
M3	15646435	15646435	31292870	15396193	15396193	30792386	500484	14300557	92.8837	649434	4.21815	446202	2.89813	1456613	9.46086	1041892	6.76721
M10	13575043	13575043	27150086	13337731	13337731	26675462	474624	12658830	94.9099	305020	2.2869	373881	2.80318	1753207	13.1447	862001	6.46288
M11	14777149	14777149	29554298	14513593	14513593	29027186	527112	13825369	95.2581	361642	2.49175	326582	2.25018	1931954	13.3113	670739	4.62145
M12	16505168	16505168	33010336	16114942	16114942	32229884	780452	15252446	94.6478	419771	2.60486	442725	2.7473	1322148	8.20449	1436234	8.91244
M18	15403431	15403431	30806862	15179363	15179363	30358726	448136	14428895	95.056	326301	2.14964	424167	2.79437	1570957	10.3493	1109237	7.30753
M19	14791761	14791761	29583522	14615040	14615040	29230080	353442	13758955	94.1424	461785	3.15966	394300	2.69791	1707676	11.6844	1147263	7.84988
M26	18888244	18888244	37776488	18587847	18587847	37175694	600794	17588525	94.6238	440330	2.36891	558992	3.0073	1736679	9.34309	1401232	7.53843
M46	14178120	14178120	28356240	14002783	14002783	28005566	350674	13466022	96.1668	233366	1.66657	303395	2.16668	1956977	13.9756	719723	5.13986
M53	17380539	17380539	34761078	17151536	17151536	34303072	458006	15971838	93.1219	715470	4.17146	464228	2.70663	1506058	8.78089	1445042	8.42515
M54	17007569	17007569	34015138	16748500	16748500	33497000	518138	15598288	93.1324	633343	3.78149	516869	3.08606	1729704	10.3275	1318483	7.87225
M55	16423107	16423107	32846214	16211289	16211289	32422578	423636	15087202	93.066	643354	3.96856	480733	2.96542	1812134	11.1782	1022336	6.30632
M59	15764683	15764683	31529366	15577575	15577575	31155150	374216	14660280	94.1114	449450	2.88524	467845	3.00332	1378232	8.84754	1081342	6.94166
M61	15556503	15556503	31113006	15332622	15332622	30665244	447762	14474449	94.403	394891	2.5755	463282	3.02154	1339214	8.73441	1125441	7.34017
M63	16554614	16554614	33109228	16359501	16359501	32719002	390226	15409762	94.1946	505636	3.09078	444103	2.71465	1138167	6.95722	1402416	8.57249
M68	16181956	16181956	32363912	15955270	15955270	31910540	453372	14878375	93.2505	626340	3.9256	450555	2.82386	1584238	9.92925	1206937	7.5645
M69	16575604	16575604	33151208	16368158	16368158	32736316	414892	15446878	94.3715	493277	3.01364	428003	2.61485	1614277	9.8623	1242388	7.59027
M70	15648586	15648586	31297172	15462025	15462025	30924050	373122	14564929	94.1981	476918	3.08445	420178	2.71748	1478619	9.56291	1165958	7.54078
M72	16742006	16742006	33484012	16507152	16507152	33014304	469708	15474554	93.7445	567268	3.4365	465330	2.81896	1605405	9.72551	1288731	7.80711
